# Supplementary material for: IL-35 is critical in suppressing superantigenic Staphylococcus aureus-driven inflammatory Th17 responses in human nasopharynx-associated lymphoid tissue
Source: Springer Nature journal article supplement (doi:10.1038/s41385-019-0246-1), 2020-01-02
Supplement: MOESM1 [file 41385_2019_246_MOESM1_ESM.pdf]

## Supplementary information

Supplementary Fig. 1

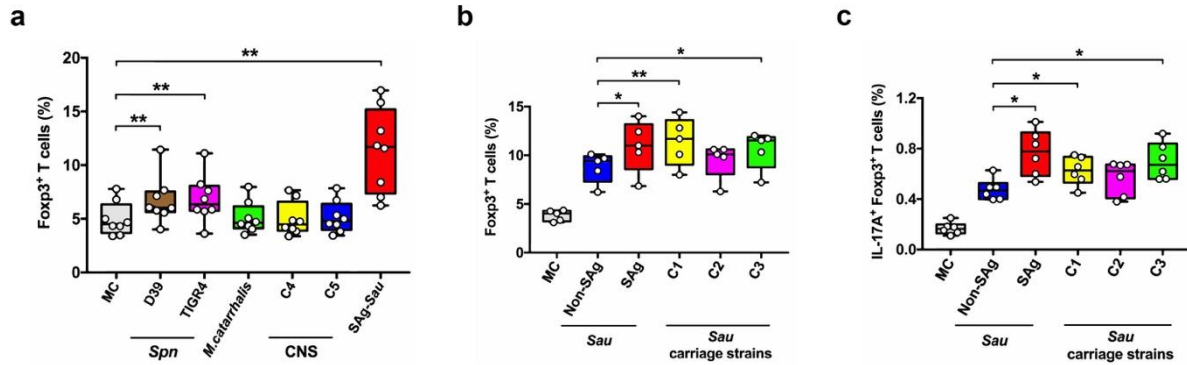

**Supplementary Fig. 1. SAg-Sau stimulation expands Fcγp3<sup>+</sup> Treg population and induces IL-17A<sup>+</sup>Fcγp3<sup>+</sup> CD4<sup>+</sup> T cells in tonsillar MNCs.** Analysis of Treg expansion (**a**, **b**) and IL-17A-expressing Tregs (**c**) in isolated human tonsillar MNCs at 48hrs following bacterial CCS (1μg/ml) stimulation. **a**) Tonsillar MNCs were stimulated with CCS produced from *Spn*, *M. catarrhalis*, coagulase-negative staphylococcus (CNS, C4 and C5) and SAg-Sau, and the proportion of Tregs was analysed. Proportion of Tregs (**b**) and IL-17A-expressing Tregs (**c**) in CD4<sup>+</sup> T cell population activated by NonSAg-Sau, SAg-Sau and *Sau* carriage strains (C1, C2 and C3). Results represent 8 (**a**), 5 (**b**) and 6 (**c**) independent experiments. Data displayed is median (center line), upper and lower quartile (box limits) and minimum to maximum range (whiskers). (\*  $p < 0.05$ , \*\*  $p < 0.01$ )

## Supplementary Fig. 2

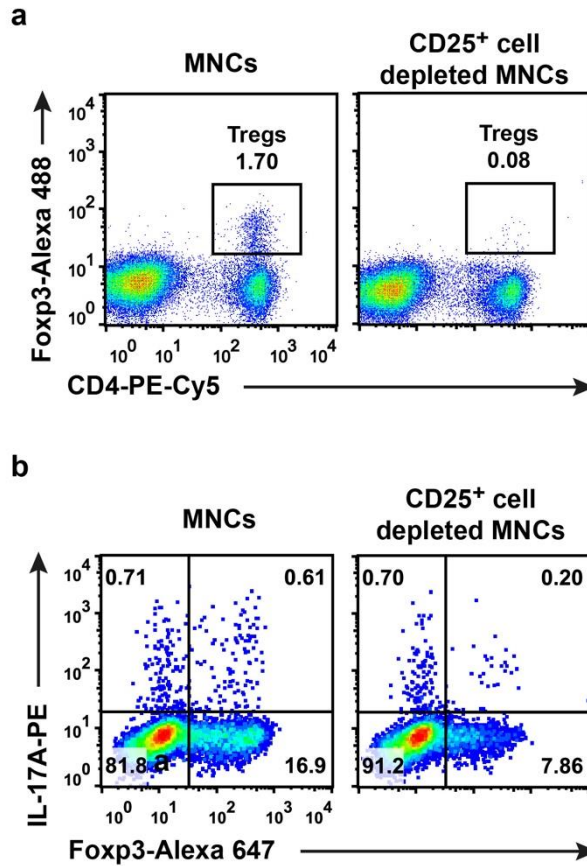

**Supplementary Fig. 2. CD25<sup>+</sup> cell depletion removes Foxp3<sup>+</sup> Tregs in tonsillar MNCs.** **a)** Foxp3<sup>+</sup> CD4<sup>+</sup> cells (Tregs) were gated out in the rectangular boxes with numbers on top indicating the percentage of Tregs in lymphocytes before and after CD25<sup>+</sup> cell depletion. **b)** Unfractionated and CD25<sup>+</sup> cell-depleted MNCs were stimulated with 1 $\mu$ g/ml of SAg-Sau CCS for 48hrs and activation of IL-17<sup>+</sup> T cells was examined. CD4<sup>+</sup> T cells were gated out in the representative dot plots and numbers in top right and left quadrants indicating percentages of IL-17A<sup>+</sup> cells within Foxp3<sup>+</sup> and Foxp3<sup>-</sup> T cells respectively. Results are representative of 3 individual samples.

### Supplementary Fig. 3

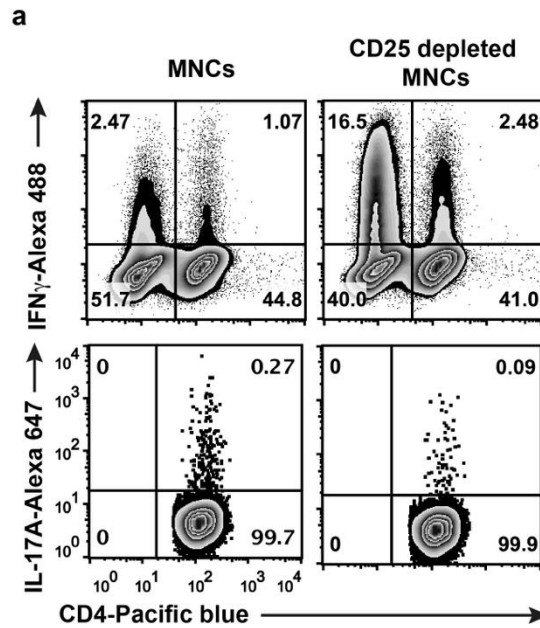

**Supplementary Fig. 3. Foxp3<sup>+</sup> Tregs suppresses the Th1 but not Th17 responses in PBMCs activated by SAg-Sau.** IL-17A and IFN $\gamma$  expression in unfractionated PBMCs or CD25<sup>+</sup> cell depleted PBMCs stimulated with SAg-Sau CCS (1 $\mu$ g/ml) at 48hrs. **a)** Zebra plots were gated on lymphocytes for IFN $\gamma$  expression. Numbers in top left and right quadrants indicate the percentage of IFN $\gamma$ <sup>+</sup> CD4<sup>-</sup> lymphocytes and IFN $\gamma$ <sup>+</sup> CD4<sup>+</sup> T cells (Th1) respectively. For the expression of IL-17A, zebra plots were gated on CD4<sup>+</sup> T cells and the percentage of Th17 cells within CD4<sup>+</sup> T cell population was indicated in the top right quadrants.

Supplementary Fig. 4

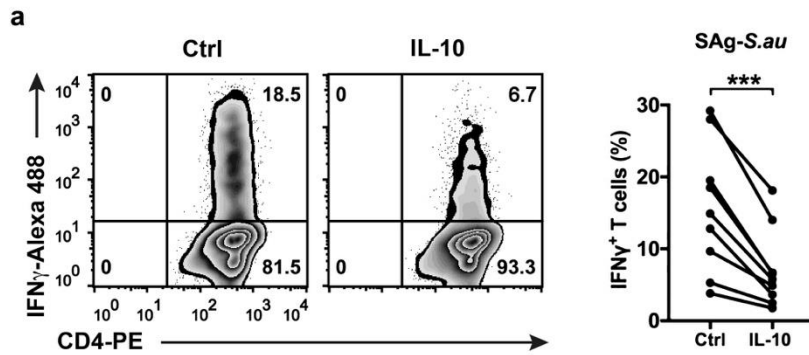

**Supplementary Fig. 4. IL-10 suppresses SAg-Sau-activated Th1 responses.** Zebra plots were gated on CD4<sup>+</sup> T cells and numbers in top right quadrants indicate the percentage of Th1 cell within CD4<sup>+</sup> T cell population. Ctrl is the stimulation control without IL-10 treatment. Results represent 8 independent experiments and were analysed using paired *t*-test (\*\**p* < 0.001).

**Supplementary Fig. 5**

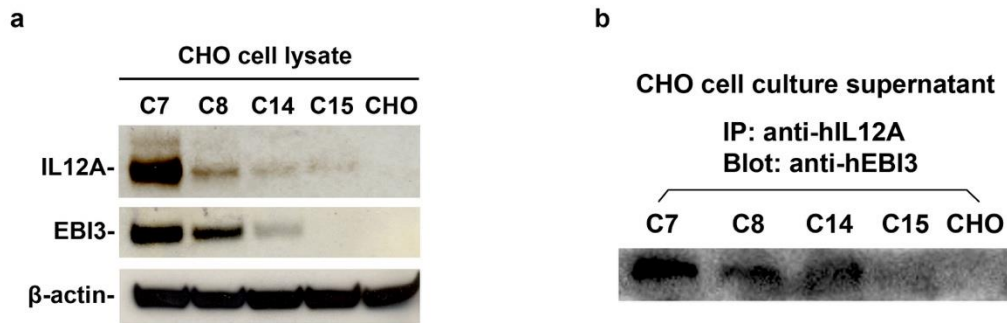

**Supplementary Fig. 5. Expression and secretion of native IL-35 by transfected CHO cells.** Control CHO and IL-35 expressing CHO cells (Clone 7, 8, 14, 15) were cultured for 48hrs. **a)** Protein expression of IL-12A and EBI3 in cell lysates. **b)** Production of IL-35 heterodimer in cell culture supernatant as detected by co-immunoprecipitation.

Supplementary Fig. 6

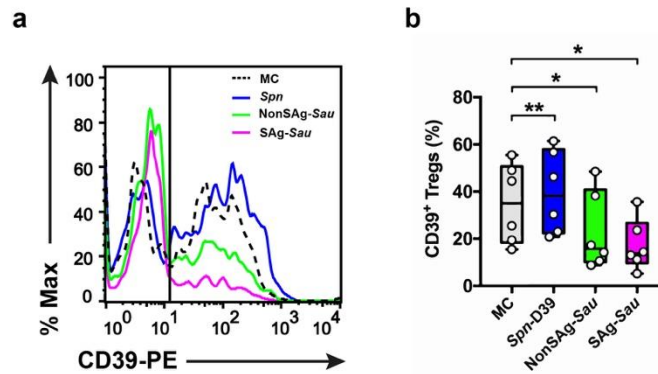

Supplementary Fig. 6. *SAg-Sau* stimulation downregulates cell surface expression of CD39 on *Foxp3*<sup>+</sup> Tregs.

Tonsillar MNCs were stimulated with 1 $\mu$ g/ml of *Spn*, *NonSAg-Sau* and *SAg-Sau* CCS respectively for 48hrs. Expression of CD39 was detected by cell surface staining and compare to media control (MC). **a)** Histogram plots were gated on *Foxp3*<sup>+</sup> *CD4*<sup>+</sup> cells, and the percentage of CD39<sup>+</sup> cells within Tregs were analysed in **(b)**. Results represent 6 independent experiments. Data displayed is median (center line), upper and lower quartile (box limits) and minimum to maximum range (whiskers). (\* $p < 0.05$ , \*\* $p < 0.01$ )

**Supplementary Fig. 7**

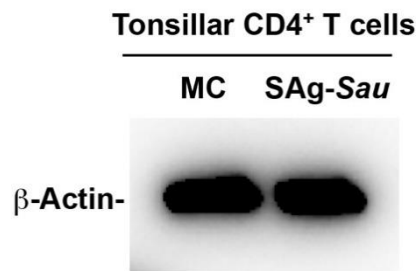

**Supplementary Fig. 7. β-actin expression in CD4<sup>+</sup> T cell lysates.** β-actin was detected by Western blot for the CD4<sup>+</sup> T cell lysates prepared for IL-35 immunoprecipitation assay.
